# Supplementary material
Source: PubMed Central journal article supplement (PMC10306110)
Supplement: NIHMS1896531-supplement-1.pdf [file NIHMS1896531-supplement-1.pdf]

## Data S1

**Experiments related to anxiolytic effects, pharmacokinetic analysis, locomotor activities; and anxiety like behavior in learned helplessness for compounds '8090 and '8219, related to Figure 5,6 and 7.**

### Contents

|                                                                                                                                                                                                                                                                               |     |
|-------------------------------------------------------------------------------------------------------------------------------------------------------------------------------------------------------------------------------------------------------------------------------|-----|
| Figure S1. Anxiolytic effects of compounds 8219 and 8090 in the Elevated plus maze assay.                                                                                                                                                                                     | p.2 |
| Figure S2. Pharmacokinetic analysis of '8090 and '8219.                                                                                                                                                                                                                       | p.3 |
| Figure S3. Total fluid consumed in response to the vehicle, '8090, or '8219, or the vehicle, ibogaine, or fluoxetine, related the sucrose preference test in Figure 6 and sucrose preference and tail suspension results in response to the vehicle, ibogaine, or fluoxetine. | p.4 |
| Figure S4. Locomotor activities in the open field in response to the vehicle, '8090, or '8219, or the vehicle, ibogaine, or fluoxetine.                                                                                                                                       | p.6 |
| Figure S5. Anxiety-like behaviors in learned helplessness C57BL/6J mice given the vehicle, 8090, or '8219, or the vehicle, ibogaine, or fluoxetine.                                                                                                                           | p.7 |

**Figure S1. Anxiolytic effects of compounds 8219 and 8090 in the Elevated plus maze assay.**

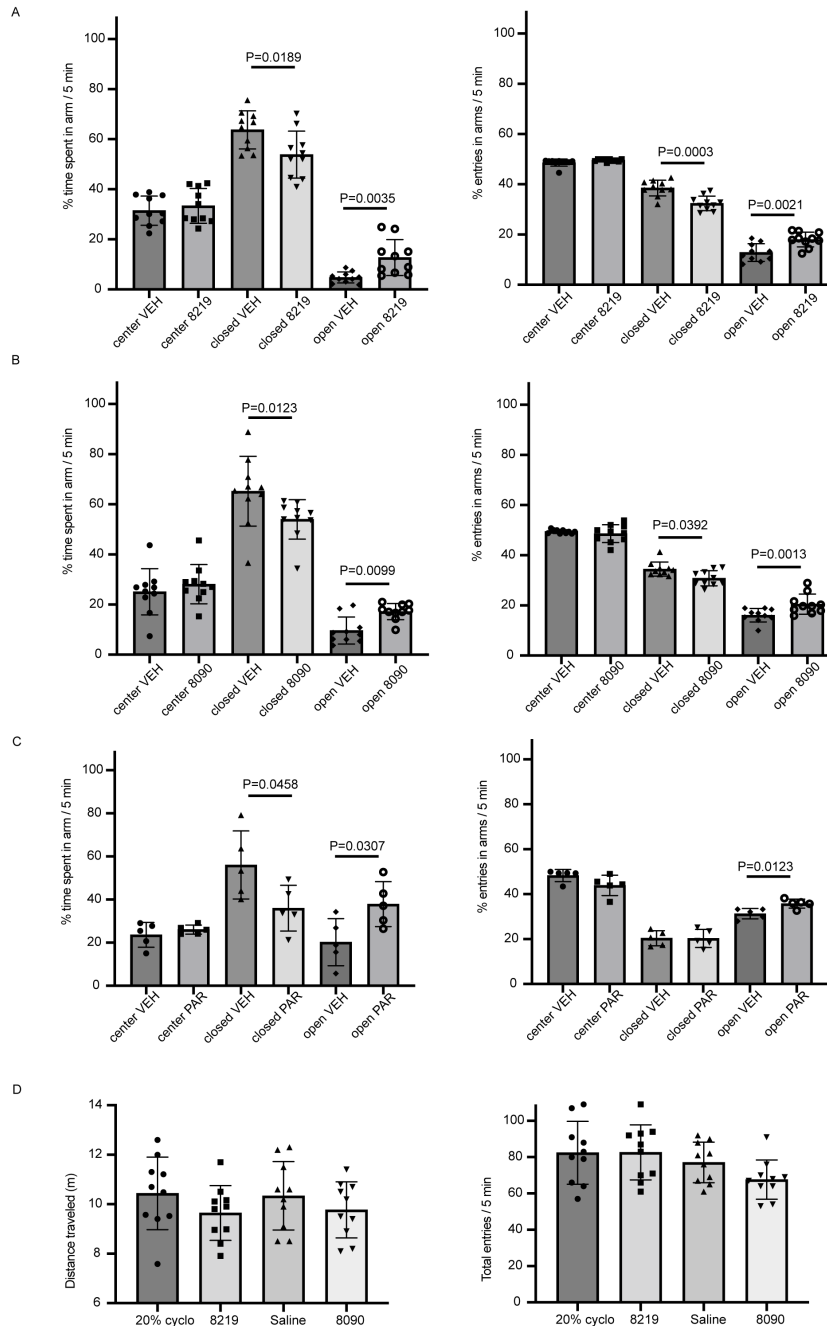

**(A-B)** Effect of chronic administration of ‘8219 (A; 10 mg/kg for 10 days; N=10) and ‘8090 (B; 10 mg/kg for 10 days; N=10) on the time spent (left) and the number of entries (right) into each arm (center, closed and open) of the elevated plus maze. **(C)** Effect of a single administration of paroxetine (PAR; 10 mg/kg; N=5) on the time spent (left) and the number of entries (right) into each arm (center, closed and open) of the elevated plus maze. **(D)** Effect of compounds ‘8219 (N=10) and ‘8090 (N=10) on the traveled distance (left) and the total number of entries (right) into all arms of the elevated plus maze. Data are presented as mean  $\pm$  SEM. Significance levels were determined using an unpaired Student’s t-test and comparing the effect of compounds 8219 and 8090 to their own vehicle (20% cyclodextrin and saline respectively).

**Figure S2. Pharmacokinetic analysis of '8090 and '8219.**

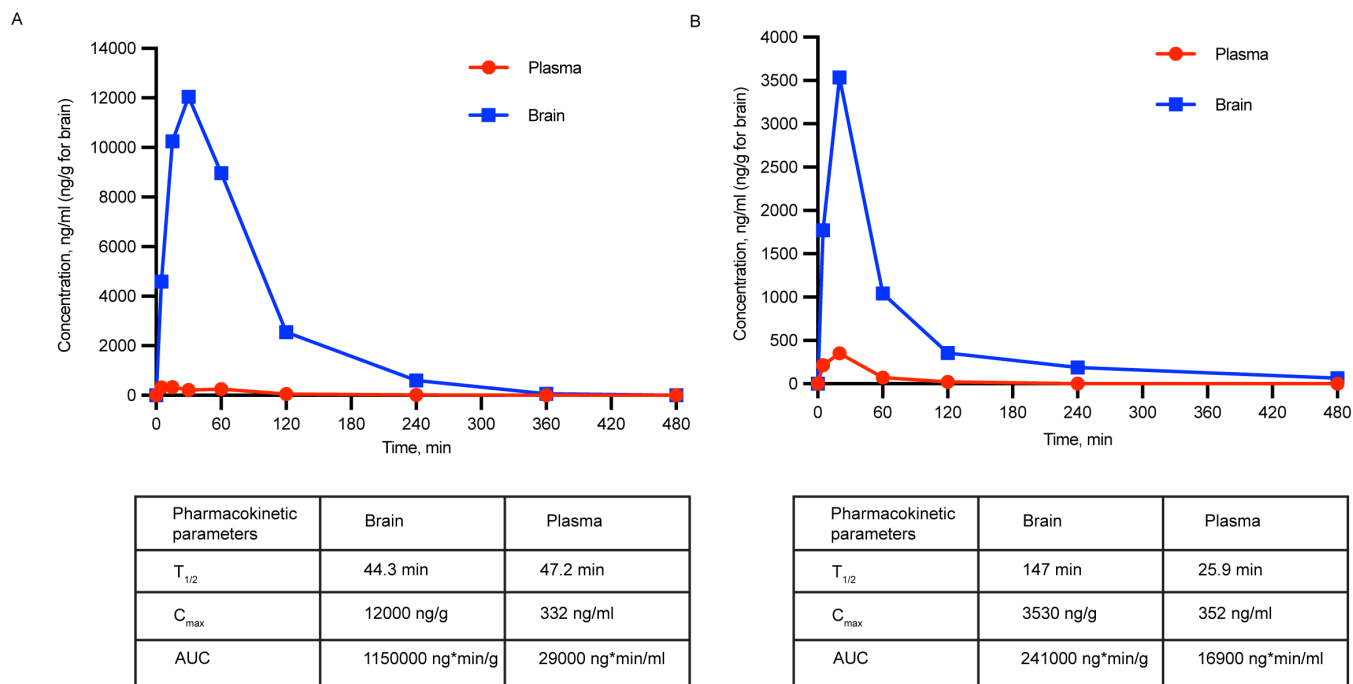

**(A)** Concentration-time curve for '8090 in mice following IP dosing at 10 mg/kg.

**(B)** Concentration-time curve for '8219 in mice following IP dosing at 10 mg/kg.

**Figure S3. Total fluid consumed in response to the vehicle, '8090, or '8219, or the vehicle, ibogaine, or fluoxetine, related the sucrose preference test in Figure 6 and sucrose preference and tail suspension results in response to the vehicle, ibogaine, or fluoxetine.**

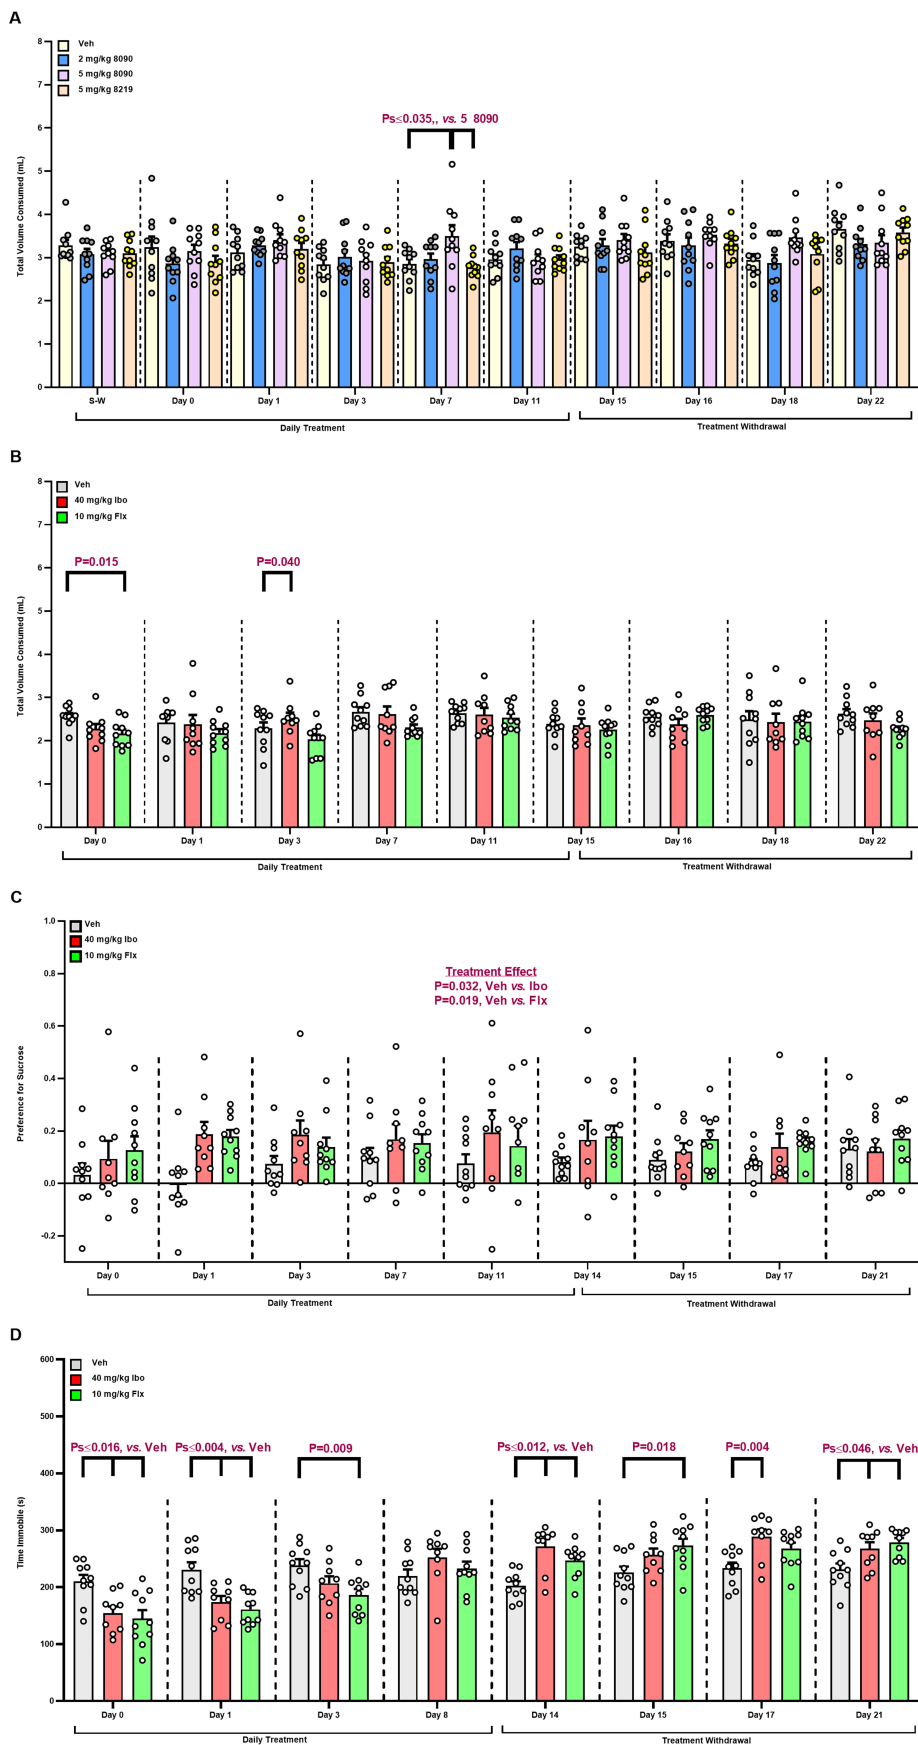

**(A)** Total volume consumed by learned helpless (LH) C57BL/6J mice treated chronically with the vehicle (Veh), '8090, or '8219. Mice were administered the Veh, 2 or 5 mg/kg '8090, or 5 mg/kg '8219 and tested over days for sucrose preference. N=10 mice mice/treatment. **(B)** The total volume consumed by LH C57BL/6J mice. Mice received the Veh, 40 mg/kg ibogaine (Ibo), or 10 mg/kg fluoxetine (Flx) and were tested over days for sucrose preference. N=9-10 mice/treatment. The primary statistics are found in Table S6. **(C)** Sucrose preference in learned helpless mice. **(D)** Tail suspension in LH mice. N=9-10 mice/treatment. The primary statistics reside in Table S6.

**Figure S4. Locomotor activities in the open field in response to the vehicle, '8090, or '8219, or the vehicle, ibogaine, or fluoxetine.**

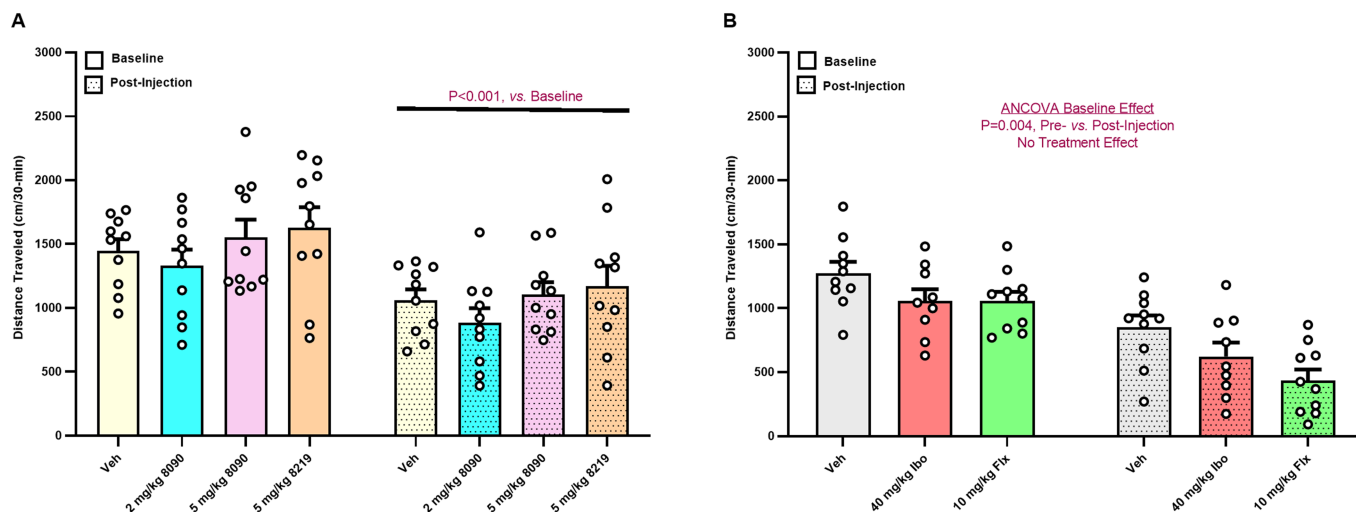

**(A)** Locomotion in learned helpless (LH) C57BL/6J mice treated chronically with the vehicle (Veh), 2 or 5 mg/kg '8090, or 5 mg/kg '8219. Mice were tested on day 12. N=10 mice mice/treatment.  
**(B)** Locomotor activities in LH C57BL/6J mice that received the Veh, 40 mg/kg ibogaine (lbo), or 10 mg/kg fluoxetine (Flx) and were tested on day 12. N=9-10 mice/treatment. The primary statistics are located in Table S6.

**Figure S5. Anxiety-like behaviors in learned helplessness C57BL/6J mice given the vehicle, 8090, or '8219, or the vehicle, ibogaine, or fluoxetine.**

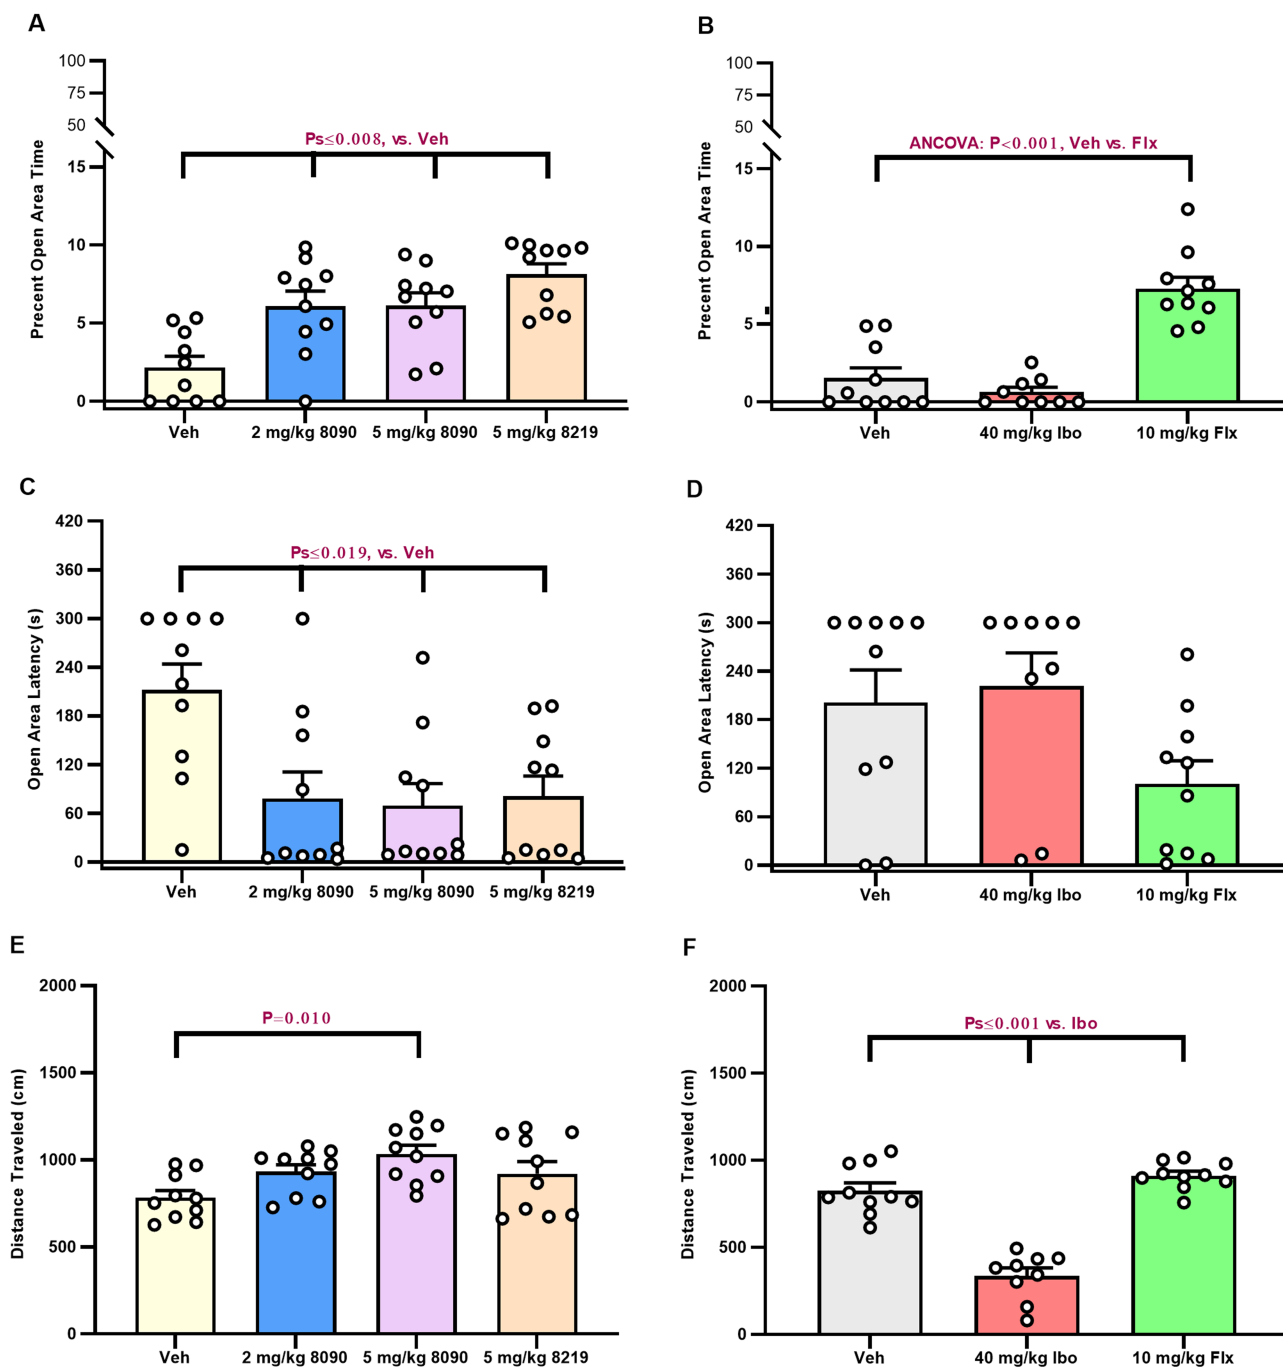

Mice were treated chronically with the vehicle (Veh), 2 or 5 mg/kg '8090, or 5 mg/kg '8219; or with the Veh, 40 mg/kg ibogaine (Ibo), and 10 mg/kg fluoxetine (Flx). Thirty min after injection, mice were tested for 5 min in the elevated zero maze. **(A-B)** Percent time in the open areas. **(C-D)** Latency to enter the open areas. **(E-F)** Locomotor activities. N=10 mice/treatment for panels A, C, and E; or N=9-10 for panels B, D, and F. The primary statistics are in Table S6.
