# Supplementary material
Source: PubMed Central journal article supplement (PMC10306110)
Supplement: NIHMS1896531-supplement-2.pdf [file NIHMS1896531-supplement-2.pdf]

**Table S1. Active docking hits that inhibited  $\geq 50\%$  of [ $^3\text{H}$ ]5-HT transport by SERT, related to Figure 1 and STAR methods.**

| ZINC-ID          | Chemical Structure                                                                  | % Inhibition | SEM | n |
|------------------|-------------------------------------------------------------------------------------|--------------|-----|---|
| ZINC000623997601 | 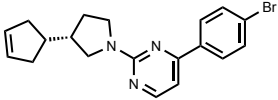   | 63           | 4   | 3 |
| ZINC000305339642 |    | 94           | 1   | 3 |
| ZINC000853098204 |    | 50           | 7   | 3 |
| ZINC000623756919 |    | 82           | 2   | 4 |
| ZINC000897222313 |    | 81           | 2   | 4 |
| ZINC000294308141 |   | 56           | 13  | 4 |
| ZINC000417864931 |  | 92           | 1   | 3 |
| ZINC000269761690 |  | 54           | 2   | 3 |
| ZINC000411862305 |  | 87           | 1   | 4 |
| ZINC000580533739 |  | 54           | 4   | 3 |
| ZINC000634713432 |  | 64           | 4   | 3 |
| ZINC000279319971 |  | 60           | 5   | 3 |
| ZINC000348114651 |  | 54           | 4   | 3 |

Each of the successfully synthesized compounds selected from the virtual screen were tested at a concentration of

30  $\mu$ M for inhibition of 5-HT transport into cells expressing WT SERT. Shown are the 13 compounds that inhibited transport  $\geq$  50%.

**Table S2. Active analogs of top five hits tested at SERT, related to Figure 1 and STAR methods.**

| ZINC-ID/Supplier code                 | Comment                      | Chemical Structure                                                                   | n        | Ki, $\mu\text{M}$ | *SEM         |
|---------------------------------------|------------------------------|--------------------------------------------------------------------------------------|----------|-------------------|--------------|
| <b>ZINC000305339642</b>               | <b>Initial hit</b>           | 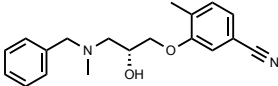   | <b>5</b> | <b>0.028</b>      | <b>0.006</b> |
| ZINC000677296032                      | analog of ZINC000305339642   |    | 1        | 0.141             | 0.021        |
| ZINC000387330406                      | analog of ZINC000305339642   |    | 5        | 0.173             | 0.033        |
| Z4135312238                           | analog of ZINC000305339642   |    | 3        | 0.040             | 0.008        |
| Z4135312239                           | analog of ZINC000305339642   |    | 4        | 0.027             | 0.005        |
| <b>ZINC000623756919</b>               | <b>Initial hit</b>           |    | <b>3</b> | <b>1.63</b>       | <b>0.02</b>  |
| ZINC000863582102                      | analog of ZINC000623756919   |    | 1        | 0.14              | 0.02         |
| ZINC000449730871                      | analog of ZINC000623756919   |  | 1        | 0.71              | 0.11         |
| Z4145515674                           | analog of ZINC000623756919   |  | 1        | 2.50              | 0.39         |
| Z4167665784                           | analog of ZINC000623756919   |  | 1        | 2.21              | 0.33         |
| <b>ZINC000897222313</b>               | <b>Initial hit</b>           |  | <b>3</b> | <b>1.47</b>       | <b>0.07</b>  |
| ZINC000866205875                      | analog of ZINC000897222313   |  | 4        | 0.057             | 0.030        |
| ZINC000443438219<br>Racemic mix -8221 | analog of ZINC000897222313   |  | 5        | 0.016             | 0.002        |
| ZINC000443438219                      | R-isomer of ZINC000443438219 |  | 3        | 0.0030            | 0.0004       |
| ZINC000443438221                      | S-isomer of ZINC000443438219 |  | 3        | 0.17              | 0.06         |

|                         |                               |                                                                                      |          |             |             |
|-------------------------|-------------------------------|--------------------------------------------------------------------------------------|----------|-------------|-------------|
| ZINC000236204386        | analog of<br>ZINC000443438219 | 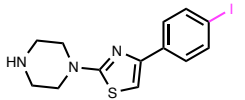   | 3        | 0.21        | 0.07        |
| ZINC000044494100        | analog of<br>ZINC000443438219 |    | 5        | 0.015       | 0.006       |
| ZINC000277296162        | analog of<br>ZINC000897222313 |    | 3        | 0.026       | 0.014       |
| ZINC000420267969        | analog of<br>ZINC000897222313 |    | 3        | 0.048       | 0.015       |
| ZINC000006658090        | analog of<br>ZINC000897222313 |    | 3        | 0.014       | 0.001       |
| ZINC000900380018        | analog of<br>ZINC000897222313 |    | 2        | 0.50        | 0.19        |
| <b>ZINC000417864931</b> | <b>Initial hit</b>            |    | <b>2</b> | <b>1.16</b> | <b>0.14</b> |
| ZINC000657329003        | analog of<br>ZINC000417864931 |   | 3        | 0.27        | 0.18        |
| ZINC000651685066        | analog of<br>ZINC000417864931 |  | 2        | 0.99        | 0.03        |
| ZINC000894225026        | analog of<br>ZINC000417864931 |  | 2        | 0.40        | 0.13        |
| <b>ZINC000411862305</b> | <b>Initial hit</b>            |  | <b>2</b> | <b>1.22</b> | <b>0.06</b> |
| ZINC001170690351        | analog of<br>ZINC000411862305 |  | 7        | 0.11        | 0.04        |
| ZINC001332938263        | analog of<br>ZINC000411862305 |  | 3        | 0.27        | 0.18        |
| Z4135312264             | analog of<br>ZINC000411862305 |  | 2        | 0.28        | 0.19        |

Affinities were measured as the half-maximal concentration required to displace [ $^{125}$ I] $\beta$ -CIT from membranes from cells expressing WT SERT. IC<sub>50</sub> values were determined by analyzing displacement curves using Origin (Originlab). \*SEM values were calculated from multiple experiments using Origin, except for cases when only one

measurement was made, and then, the value shown for SEM was the uncertainty reported by Origin for the determination of  $IC_{50}$  from the curve fit.

**Table S3. Cryo-EM data collection, refinement and validation statistics, related to Figure 4 and Figure S3.**

|                                                           | <b>SERT-Fab15B8<br/>'8090-bound<br/>(EMDB: EMD-26160)<br/>(PDB: 7TXT)</b> |
|-----------------------------------------------------------|---------------------------------------------------------------------------|
| <b>Data collection</b>                                    |                                                                           |
| Microscope                                                | Thermo Scientific Krios G3i                                               |
| Detector                                                  | Gatan K3 with Gatan BioQuantum Energy filter                              |
| Voltage (kV)                                              | 300                                                                       |
| Magnification                                             | 105,000                                                                   |
| Defocus range ( $\mu\text{m}$ )                           | -1.0 to -2.1                                                              |
| Pixel size ( $\text{\AA}$ )                               | 0.81 (physical)                                                           |
| Total exposure ( $\text{e}^-/\text{\AA}^2$ )              | 50                                                                        |
| Frame exposure ( $\text{e}^-/\text{\AA}^2/\text{frame}$ ) | 0.833                                                                     |
| Images, number of                                         | 5,010                                                                     |
| Frames/image, number of                                   | 60                                                                        |
| Initial particles, number of                              | 3,313,742                                                                 |
| Final particles, number of                                | 187,696                                                                   |
| Symmetry imposed                                          | C1                                                                        |
| Map sharpening $B$ factor ( $\text{\AA}^2$ )              | -100                                                                      |
| Map resolution ( $\text{\AA}$ )                           | 3.0                                                                       |
| FSC threshold                                             | 0.143                                                                     |
| <b>Refinement and validation</b>                          |                                                                           |
| Initial model used (PDB code)                             | 6VRH                                                                      |
| Model resolution ( $\text{\AA}$ )                         | 3.1                                                                       |
| FSC threshold                                             | 0.5                                                                       |
| Model composition                                         |                                                                           |
| Chains                                                    | 4                                                                         |
| Non-hydrogen atoms                                        | 6093                                                                      |
| Protein residues                                          | 772                                                                       |
| Water                                                     | N/A                                                                       |
| Ligands                                                   | 1                                                                         |
| $B$ factors ( $\text{\AA}^2$ )                            |                                                                           |
| Protein                                                   | 43                                                                        |
| Ligand                                                    | 20                                                                        |
| R.m.s. deviations                                         |                                                                           |
| Bond length ( $\text{\AA}$ )                              | 0.007 (1)                                                                 |
| Bond angles ( $^\circ$ )                                  | 0.941 (0)                                                                 |
| Validation                                                |                                                                           |
| MolProbity score                                          | 1.56                                                                      |
| Clash score                                               | 8.18                                                                      |
| EMRinger score                                            | 4.50                                                                      |

|                      |       |
|----------------------|-------|
| Rotamer outliers (%) | 0.00  |
| Ramachandran plot    |       |
| Favored (%)          | 97.39 |
| Allowed (%)          | 2.61  |
| Disallowed (%)       | 0.00  |

**Table S4. Sucrose preference and total fluid volume consumed by the vehicle and fluoxetine cohort on day - 2 of learned helplessness conditioning, related to Figure 6.**

| <b>Sucrose-Water Pairing<sup>a</sup></b>   | <b>Mean</b>      | <b>SEM<sup>c</sup></b> | <b>N<sup>c</sup></b> |
|--------------------------------------------|------------------|------------------------|----------------------|
| Veh <sup>c</sup>                           | 0.041 Preference | ±0.0258                | 19                   |
| Flx <sup>c</sup>                           | 0.184 Preference | ±0.0464                | 10                   |
| <b>Total Fluid Consumption<sup>b</sup></b> |                  |                        |                      |
| Veh <sup>c</sup>                           | 2.365 mL         | ±0.063                 | 19                   |
| Flx <sup>c</sup>                           | 2.290 mL         | ±0.072                 | 10                   |

<sup>a</sup>[t(27)=2.913, P=0.007]; two-tailed test.

<sup>b</sup>[t(27)=0.737, P=0.467]; two-tailed test.

<sup>c</sup>Abbreviations: SEM, standard error of the mean; N, number of mice; Veh, vehicle; Flx, fluoxetine.



**Table S5. Shock escape and latency to escape by the vehicle and fluoxetine cohort on days -9 and -2 of learned helplessness conditioning, related to Figure 6 and S6.**

| # Escapes <sup>a</sup> |                  | Mean  | SEM <sup>c</sup> | N <sup>c</sup> |
|------------------------|------------------|-------|------------------|----------------|
| <b>Day -9</b>          | Veh <sup>c</sup> | 2.21  | ±0.575           | 19             |
|                        | Flx <sup>c</sup> | 3.00  | ±1.054           | 10             |
| <b>Day -2</b>          | Veh <sup>c</sup> | 1.89  | ±0.350           | 19             |
|                        | Flx <sup>c</sup> | 3.700 | ±1.126           | 10             |

**Shock Latency<sup>b</sup>**

|               |                  |         |        |    |
|---------------|------------------|---------|--------|----|
| <b>Day -9</b> | Veh <sup>c</sup> | 17.56 s | ±0.755 | 19 |
|               | Flx <sup>c</sup> | 15.95 s | ±1.528 | 10 |
| <b>Day -2</b> | Veh <sup>c</sup> | 18.14 s | ±0.436 | 19 |
|               | Flx <sup>c</sup> | 14.83 s | ±1.788 | 10 |

<sup>a</sup>RMANOVA: days [F(1,27)=0.110, P=0.743]; day x treatment [F(1,27)=0.766, P=0.389]; treatment [F(91,27)=2.382, p=0.134].

<sup>b</sup>RMANOVA: days [F(1,27)=0.108, 0.744]; day x treatment [F(1,27)=1.101, p=0.303]; treatment [F(91,27)=4.077, P=0.054]. For treatment, none of the Bonferroni *post-hoc* tests were significant.

<sup>c</sup>Abbreviations: SEM, standard error of the mean; N, number of mice; Veh, vehicle; Flx, fluoxetine.

**Table S6. Statistics for the behavioral studies, related to Figures 5, 6, S3-S5, and Supplemental Figures S5-S7.**

| Figure                         | Statistical Model              | Variable                         | Degrees of Freedom | F-statistic | P-value | # Mice per Group |
|--------------------------------|--------------------------------|----------------------------------|--------------------|-------------|---------|------------------|
| Figure 5                       | Three-way RMANOVA <sup>a</sup> | Days                             | 3,450              | 32.940      | <0.001  | 8-12             |
|                                |                                | Days x Gene <sup>a</sup>         | 3,450              | 8.047       | <0.001  |                  |
|                                |                                | Days x Treat <sup>a</sup>        | 24,450             | 2.161       | 0.001   |                  |
|                                |                                | Days x Gene x Treat <sup>a</sup> | 24,450             | 2.276       | <0.001  |                  |
|                                |                                | Treat <sup>a</sup>               | 8,150              | 3.373       | 0.001   |                  |
|                                |                                | Gene x Treat <sup>a</sup>        | 8,150              | 4.115       | <0.001  |                  |
| Figure 6A                      | None                           | Experimental Design              | None               | None        | None    | N.A.             |
| Figure 6B                      | Two-way RMANOVA                | Days                             | 1,36               | 30.469      | <0.001  | 10               |
|                                |                                | Days x Treat <sup>a</sup>        | 3,36               | 5.534       | 0.003   |                  |
|                                |                                | Treat <sup>a</sup>               | 3,36               | 8.083       | <0.001  |                  |
| Figure 6C                      | Two-way RMANOVA                | Days                             | 1,36               | 79.751      | <0.001  | 10               |
|                                |                                | Days x Treat <sup>a</sup>        | 3,36               | 3.673       | 0.021   |                  |
|                                |                                | Treat <sup>a</sup>               | 3,36               | 28.221      | <0.001  |                  |
| Supplemental.pdf<br>Figure S3A | Two-way RMANOVA                | Days                             | 1,36               | 23.286      | <0.001  | 10               |
|                                |                                | Days x Treat <sup>a</sup>        | 3,36               | 8.700       | <0.001  |                  |
|                                |                                | Treat <sup>a</sup>               | 3,36               | 0.982       | n.s.    |                  |
| Supplemental.pdf<br>Figure S3B | Two-way RMANOVA                | Days                             | 8,208              | 4.714       | <0.001  | 9-10             |
|                                |                                | Days x Treat <sup>a</sup>        | 16,208             | 1.851       | 0.027   |                  |
|                                |                                | Treat <sup>a</sup>               | 2,26               | 1.324       | n.s.    |                  |
| Supplemental.pdf<br>Figure S3C | Two-way RMANOVA                | Days                             | 8,208              | 0.544       | n.s.    | 9-10             |
|                                |                                | Days x Treat <sup>a</sup>        | 16,208             | 0.589       | n.s.    |                  |
|                                |                                | Treat <sup>a</sup>               | 2,26               | 5.546       | 0.010   |                  |
| Supplemental.pdf<br>Figure S3D | Two-way RMANOVA                | Days                             | 7,182              | 31.228      | <0.001  | 9-10             |
|                                |                                | Days x Treat <sup>a</sup>        | 14,182             | 8.350       | <0.001  |                  |
|                                |                                | Treat <sup>a</sup>               | 2,26               | 1.099       | n.s.    |                  |
| Supplemental.pdf<br>Figure S4A | Two-way RMANOVA                | Time                             | 1,36               | 118.728     | <0.001  | 10               |
|                                |                                | Time x Treat <sup>a</sup>        | 3,36               | 0.148       | n.s.    |                  |
|                                |                                | Treat <sup>a</sup>               | 3,36               | 1.132       | n.s.    |                  |
| Supplemental.pdf<br>Figure S4B | Two-way RMANOVA                | Time                             | 1,26               | 96.849      | <0.001  | 9-10             |
|                                |                                | Time x Treat <sup>a</sup>        | 2,26               | 1.670       | n.s.    |                  |
|                                |                                | Treat <sup>a</sup>               | 2,26               | 4.458       | 0.022   |                  |
| Supplemental.pdf<br>Figure S5A | ANCOVA                         | Treat <sup>a</sup>               | 2,25               | 2.948       | n.s.    |                  |
|                                |                                | Treat <sup>a</sup>               | 3,36               | 9.819       | <0.001  | 10               |
| Supplemental.pdf<br>Figure S5B | One-way ANOVA                  | Treat <sup>a</sup>               | 2,28               | 34.563      | <0.001  | 9-10             |
|                                |                                | Treat <sup>a</sup>               | 2,25               | 21.958      | <0.001  |                  |
| Supplemental.pdf<br>Figure S5C | One-way ANOVA                  | Treat <sup>a</sup>               | 3,36               | 5.403       | 0.004   | 10               |
| Supplemental.pdf<br>Figure S5D | One-way ANOVA                  | Treat <sup>a</sup>               | 2,28               | 3.136       | n.s.    | 9-10             |

|                                |                    |                           |      |        |        |      |
|--------------------------------|--------------------|---------------------------|------|--------|--------|------|
|                                | ANCOVA             | Treat <sup>a</sup>        | 2,25 | 1.508  | n.s.   |      |
| Supplemental.pdf<br>Figure S5E | One-way ANOVA      | Treat <sup>a</sup>        | 3,36 | 3.893  | 0.017  | 10   |
| Supplemental.pdf<br>Figure S5F | One-way ANOVA      | Treat <sup>a</sup>        | 2,28 | 61.312 | <0.001 | 9-10 |
| Figure S5A                     | Two-way<br>RMANOVA | Days                      | 1,36 | 36.013 | <0.001 | 10   |
|                                |                    | Days x Treat <sup>a</sup> | 3,36 | 2.759  | 0.053  |      |
|                                |                    | Treat <sup>a</sup>        | 3,36 | 5.778  | 0.002  |      |
| Figure S5B                     | Two-way<br>RMANOVA | Days                      | 1,36 | 17.449 | <0.001 | 10   |
|                                |                    | Days x Treat <sup>a</sup> | 3,36 | 3.308  | 0.031  |      |
|                                |                    | Treat <sup>a</sup>        | 3,36 | 3.838  | 0.002  |      |

|            |                                  |                                   |       |        |        |      |
|------------|----------------------------------|-----------------------------------|-------|--------|--------|------|
| Figure S5C | Three-way<br>RMANOVA<br>(Nested) | Days                              | 1,36  | 0.772  | n.s.   | 10   |
|            |                                  | Days x Treat <sup>a</sup>         | 3,36  | 0.414  | n.s.   |      |
|            |                                  | Inten <sup>a</sup>                | 3,108 | 52.962 | <0.001 |      |
|            |                                  | Inten x Treat <sup>a</sup>        | 9,108 | 0.914  | n.s.   |      |
|            |                                  | Days x Inten <sup>a</sup>         | 3,108 | 9.132  | <0.001 |      |
|            |                                  | Days x Inten x Treat <sup>a</sup> | 9,108 | 0.729  | n.s.   |      |
|            |                                  | Treat <sup>a</sup>                | 3,36  | 1.120  | n.s.   |      |
| Figure S6A | Two-way<br>RMANOVA               | Days                              | 3,78  | 2.229  | n.s.   | 9-10 |
|            |                                  | Days x Treat <sup>a</sup>         | 6,78  | 1.841  | n.s.   |      |
|            |                                  | Treat <sup>a</sup>                | 2,26  | 14.064 | <0.001 |      |
| Figure S6B | Two-way<br>RMANOVA               | Days                              | 3,78  | 1.892  | n.s.   | 9-10 |
|            |                                  | Days x Treat <sup>a</sup>         | 6,78  | 1.127  | n.s.   |      |
|            |                                  | Treat <sup>a</sup>                | 2,26  | 10.093 | <0.001 |      |
| Figure S6C | Three-way<br>RMANOVA<br>(Nested) | Days                              | 1,26  | 0.606  | n.s.   | 9-10 |
|            |                                  | Days x Treat <sup>a</sup>         | 2,26  | 2.688  | n.s.   |      |
|            |                                  | Inten <sup>a</sup>                | 3,78  | 24.635 | <0.001 |      |
|            |                                  | Inten x Treat <sup>a</sup>        | 6,78  | 0.880  | n.s.   |      |
|            |                                  | Days x Inten <sup>a</sup>         | 3,78  | 0.676  | n.s.   |      |
|            |                                  | Days x Inten x Treat <sup>a</sup> | 6,78  | 1.758  | n.s.   |      |
|            |                                  | Treat <sup>a</sup>                | 2,26  | 0.126  | n.s.   |      |
| Figure S7A | One-way ANOVA                    | Treat <sup>a</sup>                | 3,36  | 2.087  | 0.119  | 10   |
| Figure S7B | One-way ANOVA                    | Treat <sup>a</sup>                | 2,26  | 10.687 | <0.001 | 9-10 |
|            | ANCOVA                           | Treat <sup>a</sup>                | 2,25  | 5.945  | 0.008  |      |
| Figure S7C | One-way ANOVA                    | Treat <sup>a</sup>                | 3,36  | 5.624  | 0.003  | 10   |
| Figure S7D | One-way ANOVA                    | Treat <sup>a</sup>                | 2,26  | 12.959 | <0.001 | 9-10 |
|            | ANCOVA                           | Treat <sup>a</sup>                | 2,25  | 4.001  | 0.031  |      |
| Figure S7E | One-way ANOVA                    | Treat <sup>a</sup>                | 3,36  | 0.084  | 0.968  | 10   |
| Figure S7F | One-way ANOVA                    | Treat <sup>a</sup>                | 2,26  | 23.015 | <0.001 | 9-10 |

<sup>a</sup>Abbreviations: all statistical analyses were run as two-tailed tests; ANOVA, analysis of variance; RMANOVA, repeated measures ANOVA; ANCOVA, analyses of covariance; Gene, genotype; Treat, treatment; Inten, intensity; n.s., not significant; N.A., not applicable.
