# Supplementary material
Source: PubMed Central journal article supplement (PMC10306110)

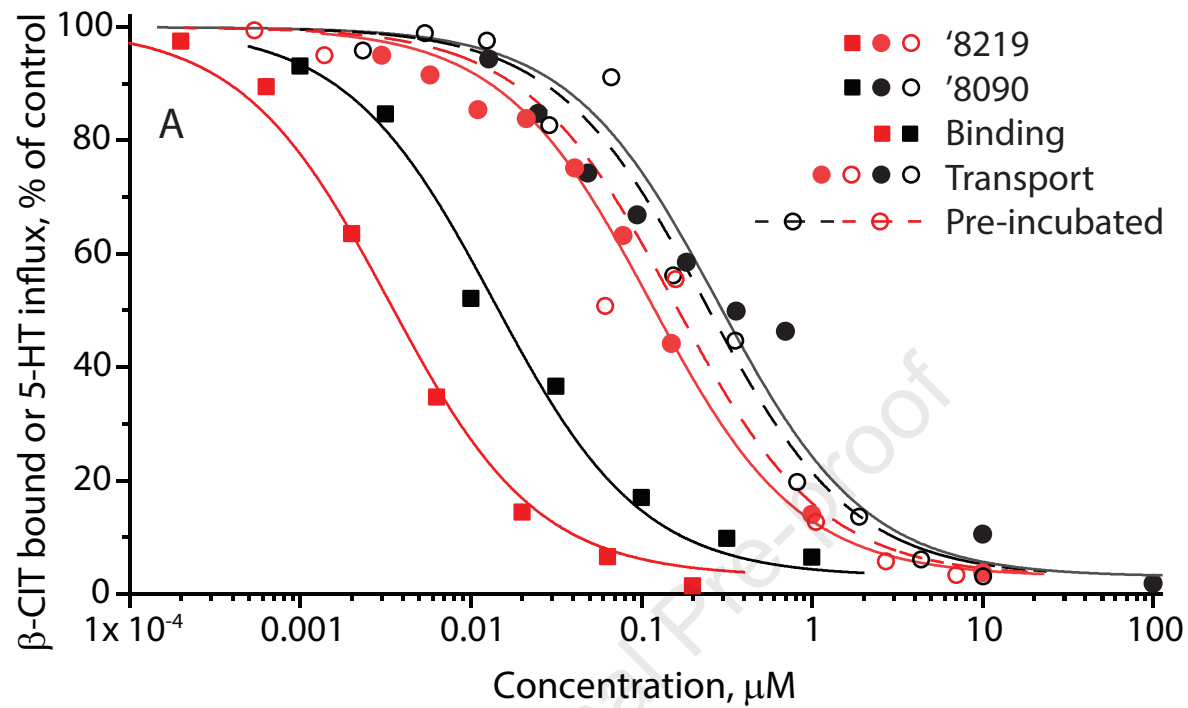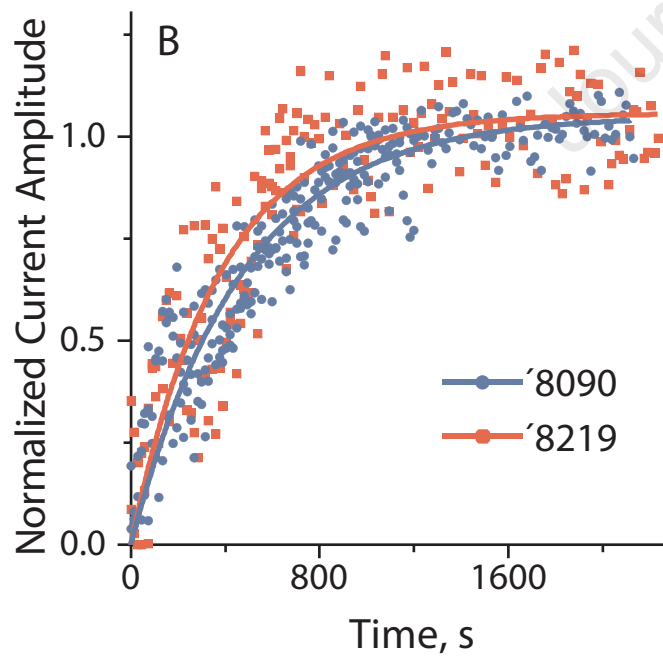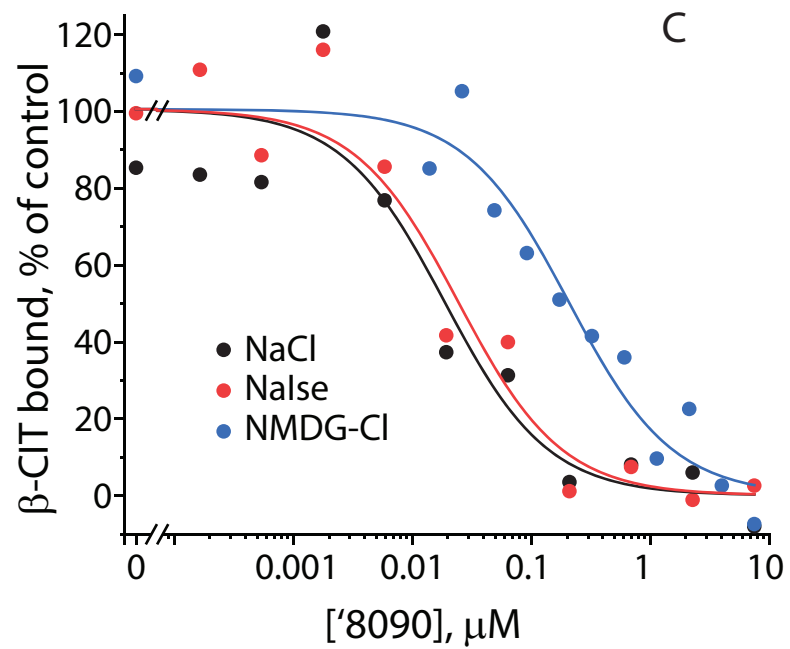

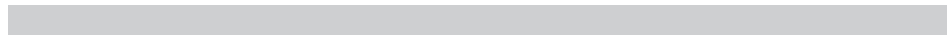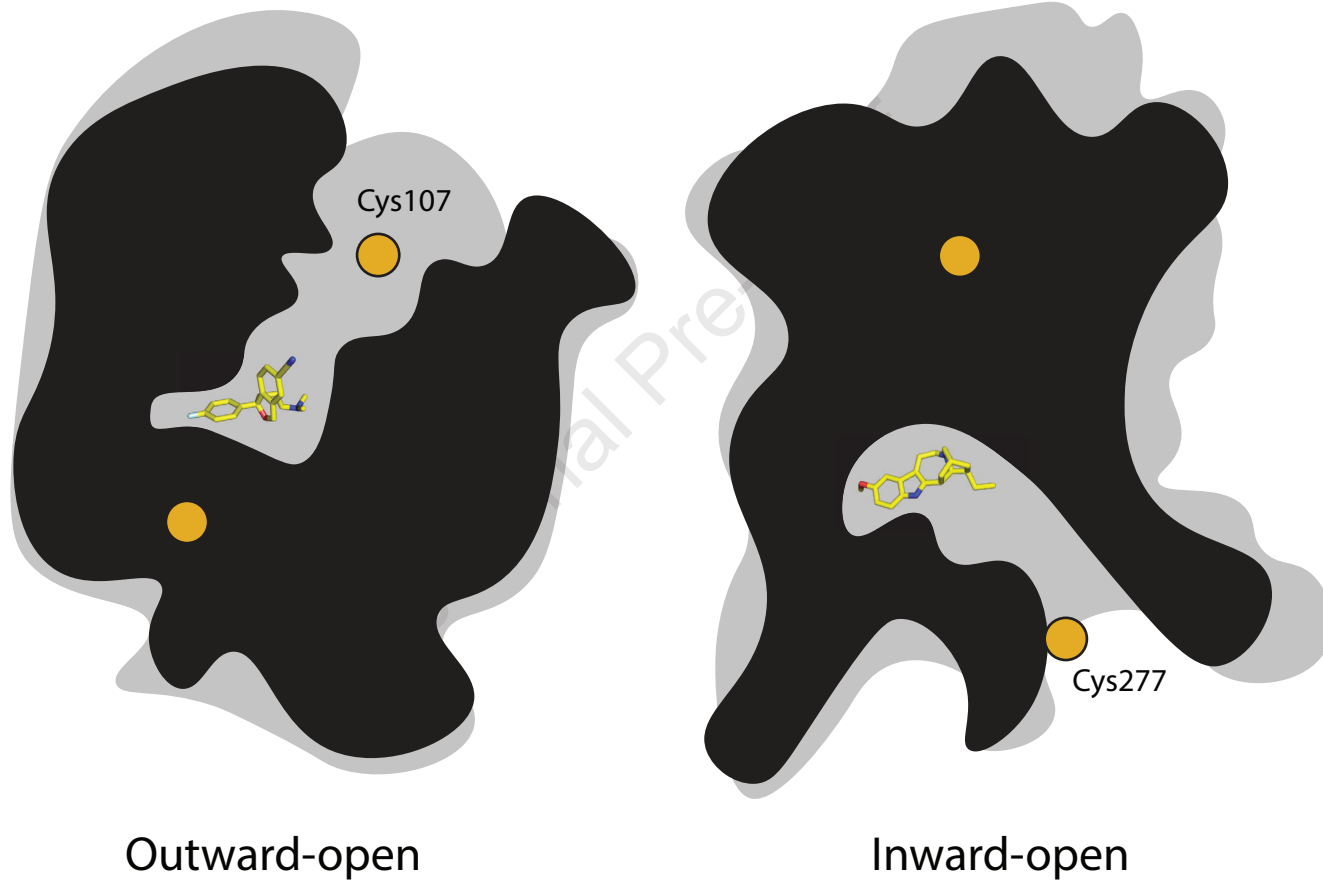

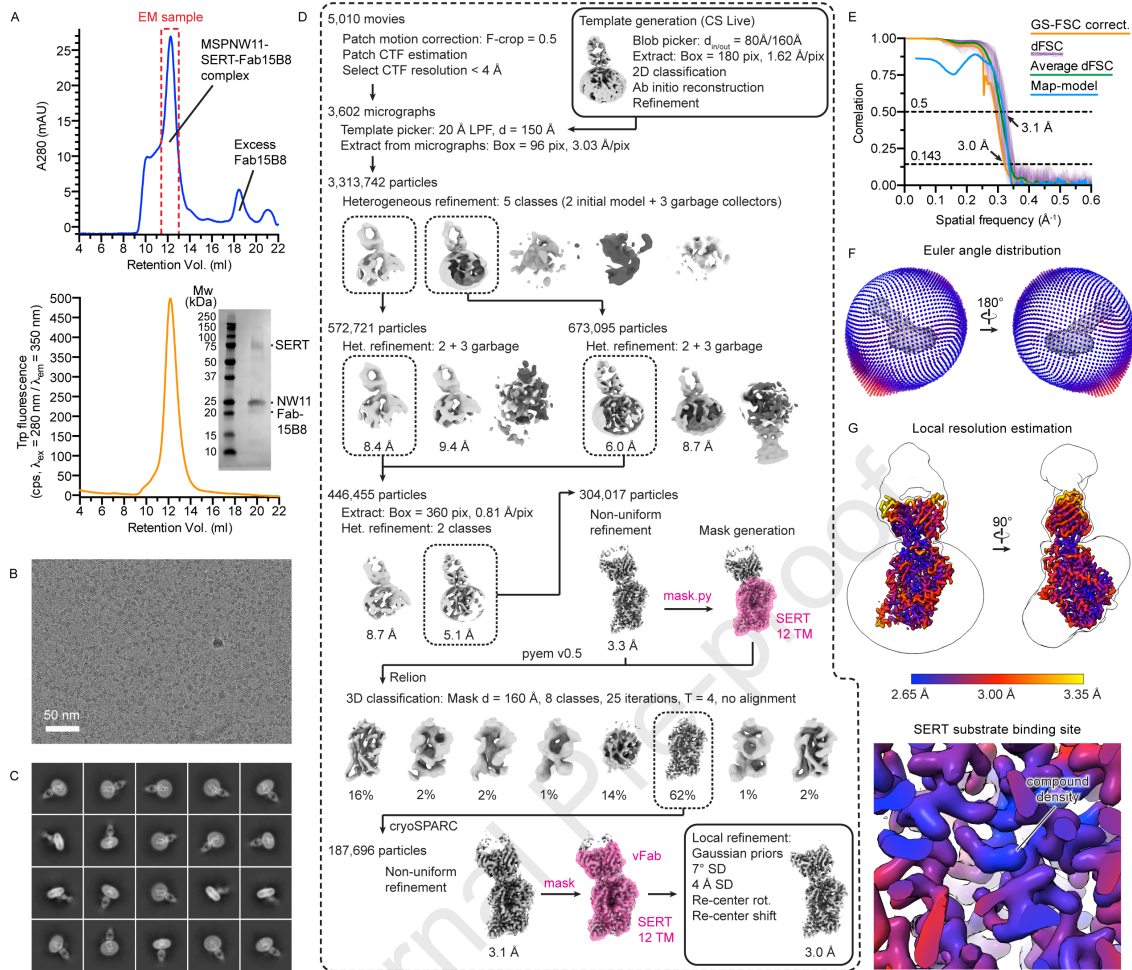

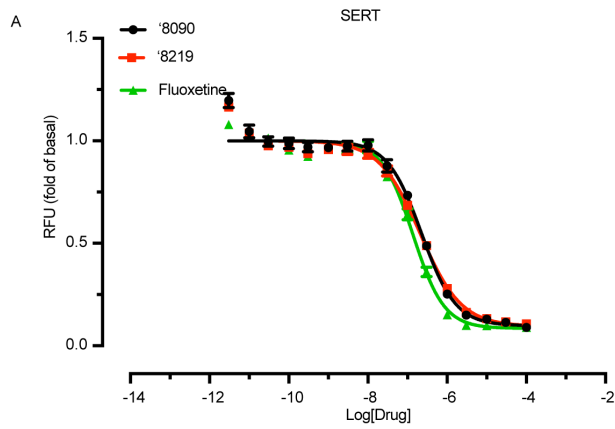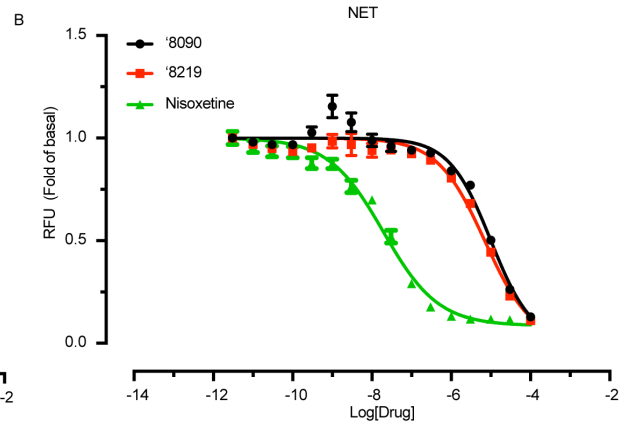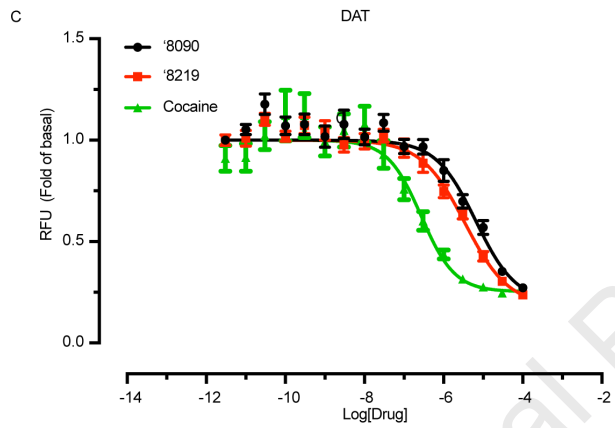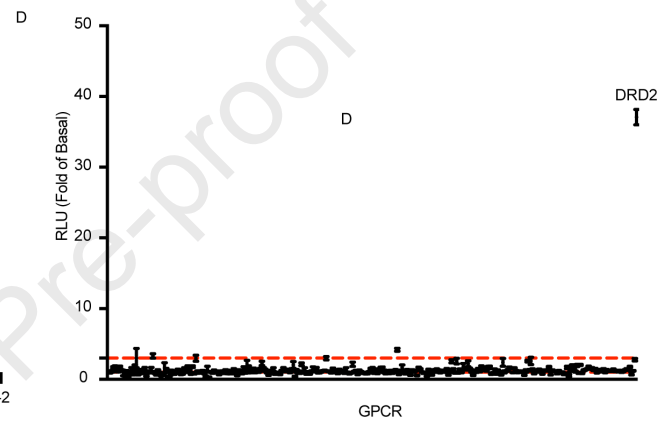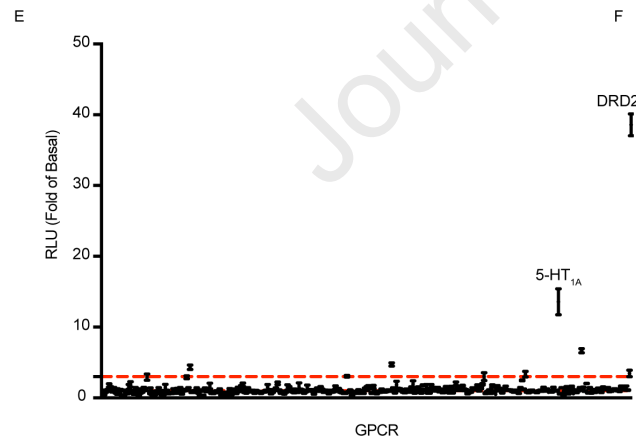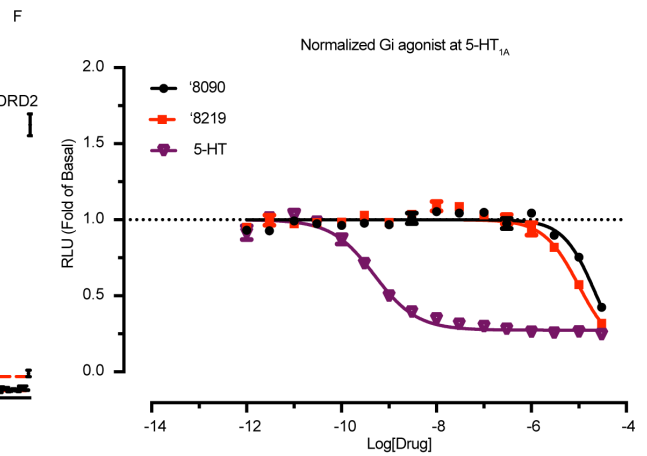

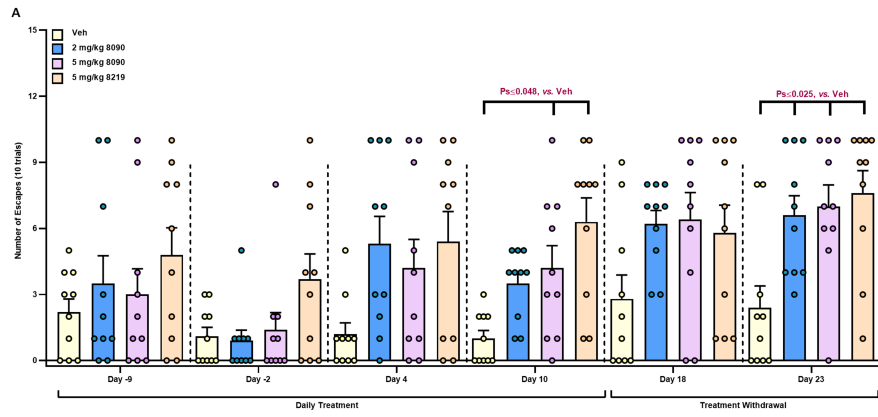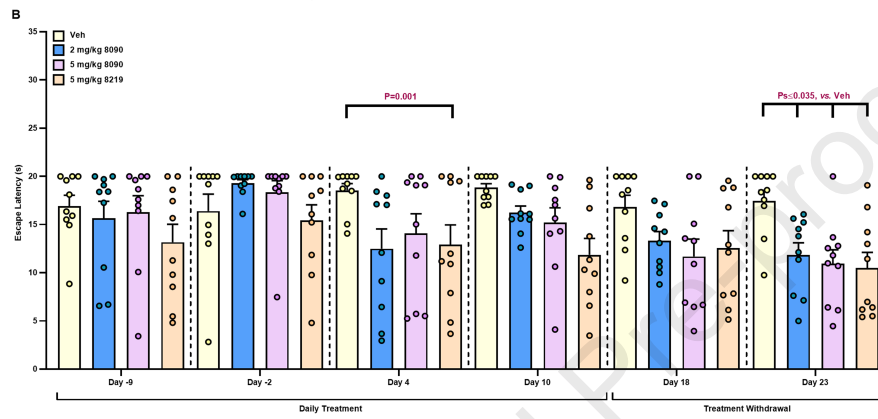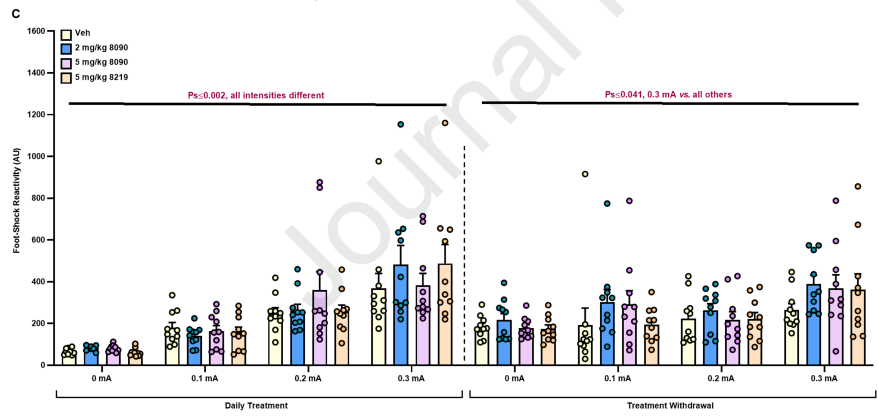

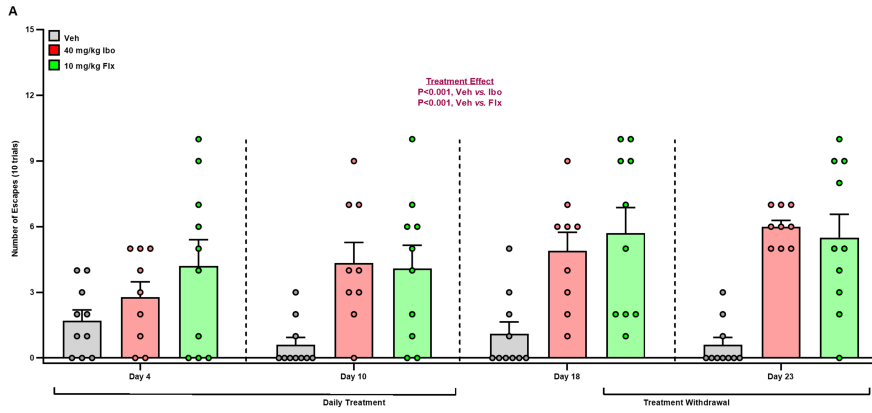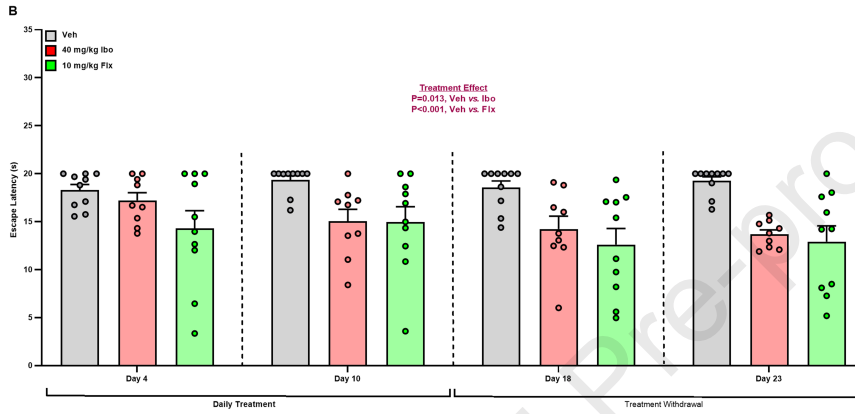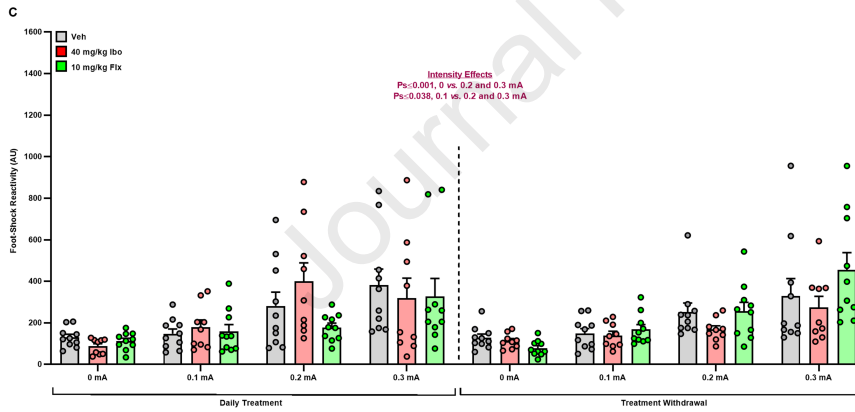

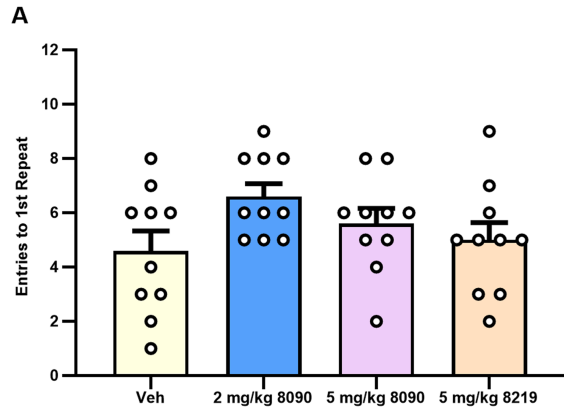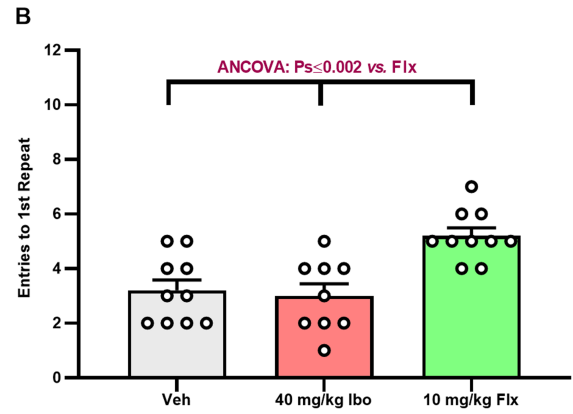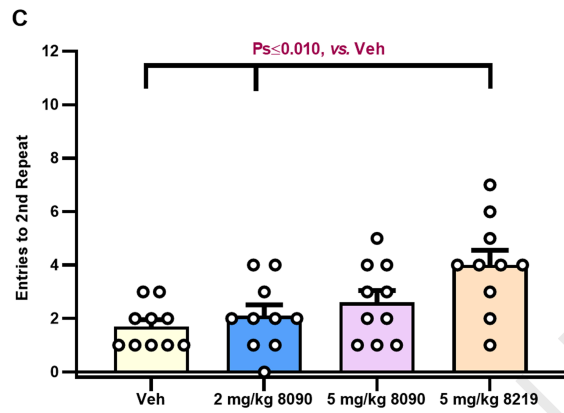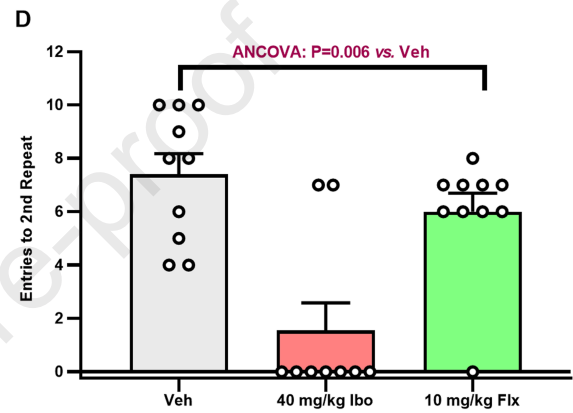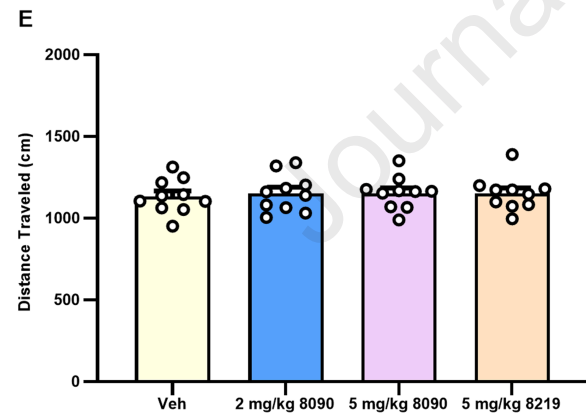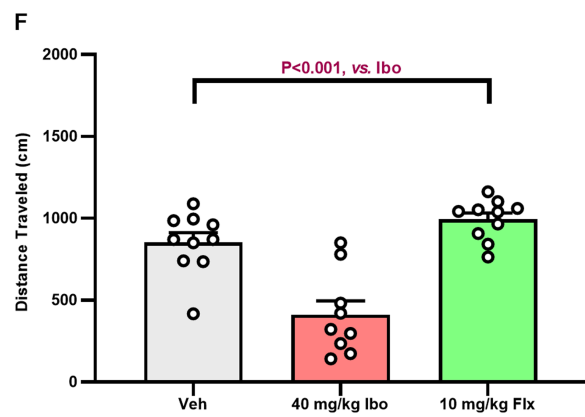

Supplement: NIHMS1896531-supplement-3.pdf [file NIHMS1896531-supplement-3.pdf]
